# Supplementary material for: Heterosis Derived From Nonadditive Effects of the BnFLC Homologs Coordinates Early Flowering and High Yield in Rapeseed (Brassica napus L.)
Source: Front Plant Sci. 2022 Feb 15;12:798371. doi: 10.3389/fpls.2021.798371 (PMC8893081; doi:10.3389/fpls.2021.798371)
Supplement: Supplementary file 3 [file Table_2.xlsx]

## Sheet: Sheet2
Supplementary Table 2. Gene annotation of candidate genes in the 727kb interval
Locus_ID	ORG	GO	KEGG	Swissprot	Pfam	NR
BnaA03G0141600ZS	zs11	GO:0000166	chaperone protein ClpD, chloroplastic; K03696 ATP-dependent Clp protease ATP-binding subunit ClpC (A)	Chaperone protein ClpD, chloroplastic OS=Arabidopsis thaliana GN=CLPD PE=1 SV=1	ATPase family associated with various cellular activities (AAA)	BnaA03g13330D [Brassica napus]
BnaA03G0141700ZS	zs11	GO:0008152	carbonyl reductase [NADPH] 1; K00079 carbonyl reductase 1 [EC:1.1.1.184 1.1.1.189 1.1.1.197] (A)	(+)-neomenthol dehydrogenase OS=Capsicum annuum GN=MNR1 PE=1 SV=1	short chain dehydrogenase	PREDICTED: (+)-neomenthol dehydrogenase [Brassica rapa]
BnaA03G0141800ZS	zs11	GO:0017009	--	Chromophore lyase CRL, chloroplastic OS=Arabidopsis thaliana GN=CRL PE=1 SV=1	CpeT/CpcT family (DUF1001)	PREDICTED: chromophore lyase CRL, chloroplastic isoform X1 [Brassica rapa]
BnaA03G0141900ZS	zs11	GO:0005506	nitrite reductase; K00366 ferredoxin-nitrite reductase [EC:1.7.7.1] (A)	Rubredoxin-1 OS=Desulfovibrio desulfuricans (strain ATCC 27774 / DSM 6949) GN=rd1 PE=1 SV=1	Rubredoxin	BnaA03g13370D [Brassica napus]
BnaA03G0142000ZS	zs11	GO:0005515	hypothetical protein; K12857 Prp8 binding protein (A)	Katanin p80 WD40 repeat-containing subunit B1 OS=Strongylocentrotus purpuratus GN=KATNB1 PE=1 SV=1	WD domain, G-beta repeat	PREDICTED: protein tipD [Brassica rapa]
BnaA03G0142100ZS	zs11	--	centromere protein S-like; K11511 centromere protein S (A)	Centromere protein S OS=Homo sapiens GN=APITD1 PE=1 SV=1	CENP-S protein	PREDICTED: uncharacterized protein LOC103857678 [Brassica rapa]
BnaA03G0142200ZS	zs11	GO:0000166	clpA; chaperone protein ClpC1, chloroplastic; K03696 ATP-dependent Clp protease ATP-binding subunit ClpC (A)	Chaperone protein ClpC1, chloroplastic OS=Arabidopsis thaliana GN=CLPC1 PE=1 SV=1	UvrB/uvrC motif	PREDICTED: chaperone protein ClpC1, chloroplastic [Brassica rapa]
BnaA03G0142300ZS	zs11	--	--	--	Protein of unknown function (DUF616)	PREDICTED: uncharacterized protein LOC103857257 [Brassica rapa]
BnaA03G0142400ZS	zs11	GO:0046983	hypothetical protein; K11253 histone H3 (A)	Transcription factor bHLH137 OS=Arabidopsis thaliana GN=BHLH137 PE=2 SV=1	Helix-loop-helix DNA-binding domain	PREDICTED: transcription factor bHLH137 [Brassica rapa]
BnaA03G0142500ZS	zs11	GO:0005515	hypothetical protein; K08332 vacuolar protein 8 (A)	U-box domain-containing protein 11 OS=Arabidopsis thaliana GN=PUB11 PE=2 SV=2	--	PREDICTED: uncharacterized protein LOC103857262 [Brassica rapa]
BnaA03G0142600ZS	zs11	GO:0005515	ubiquitin-conjugating enzyme E2 27; K04649 ubiquitin-conjugating enzyme (huntingtin interacting protein 2) [EC:2.3.2.23] (A)	Ubiquitin-conjugating enzyme E2 27 OS=Arabidopsis thaliana GN=UBC27 PE=2 SV=1	UBA/TS-N domain	PREDICTED: ubiquitin-conjugating enzyme E2 27 [Brassica rapa]
BnaA03G0142700ZS	zs11	GO:0004672	probable serine/threonine-protein kinase At1g54610; K08819 cyclin-dependent kinase 12/13 [EC:2.7.11.22 2.7.11.23] (A)	Probable serine/threonine-protein kinase At1g54610 OS=Arabidopsis thaliana GN=At1g54610 PE=1 SV=1	Protein kinase domain	PREDICTED: probable serine/threonine-protein kinase At1g54610 [Brassica rapa]
BnaA03G0142800ZS	zs11	GO:0003824	pyruvate dehydrogenase E1 component subunit beta-1, mitochondrial-like; K00162 pyruvate dehydrogenase E1 component beta subunit [EC:1.2.4.1] (A)	Pyruvate dehydrogenase E1 component subunit beta-1, mitochondrial OS=Arabidopsis thaliana GN=PDH2 PE=1 SV=2	Transketolase, C-terminal domain	BnaC03g16370D [Brassica napus]
BnaA03G0142900ZS	zs11	GO:0019905	hypothetical protein; K19535 synaptonemal complex central element protein 2 (A)	Alpha-taxilin OS=Homo sapiens GN=TXLNA PE=1 SV=3	Myosin-like coiled-coil protein	PREDICTED: beta-taxilin-like isoform X1 [Brassica rapa]
BnaA03G0143000ZS	zs11	--	--	--	--	PREDICTED: uncharacterized protein DDB_G0283697 [Brassica rapa]
BnaA03G0143100ZS	zs11	--	mitochondrial import inner membrane translocase subunit TIM8; K17780 mitochondrial import inner membrane translocase subunit TIM8 (A)	Mitochondrial import inner membrane translocase subunit TIM8 OS=Arabidopsis thaliana GN=TIM8 PE=1 SV=1	Tim10/DDP family zinc finger	PREDICTED: mitochondrial import inner membrane translocase subunit TIM8 [Brassica rapa]
BnaA03G0143200ZS	zs11	GO:0016021	bidirectional sugar transporter SWEET10; K15382 solute carrier family 50 (sugar transporter) (A)	Bidirectional sugar transporter SWEET10 OS=Arabidopsis thaliana GN=SWEET10 PE=2 SV=1	Sugar efflux transporter for intercellular exchange	PREDICTED: bidirectional sugar transporter SWEET10 [Brassica rapa]
BnaA03G0143300ZS	zs11	--	--	MORC family CW-type zinc finger protein 4 OS=Homo sapiens GN=MORC4 PE=1 SV=2	Histidine kinase-, DNA gyrase B-, and HSP90-like ATPase	PREDICTED: uncharacterized protein LOC103857271 [Brassica rapa]
BnaA03G0143400ZS	zs11	--	auxin-responsive protein SAUR72-like; K14488 SAUR family protein (A)	Auxin-responsive protein SAUR72 OS=Arabidopsis thaliana GN=SAUR72 PE=2 SV=1	Auxin responsive protein	PREDICTED: uncharacterized protein LOC103857272 [Brassica rapa]
BnaA03G0143500ZS	zs11	GO:0030001	uncharacterized LOC100305622; K07213 copper chaperone (A)	Heavy metal-associated isoprenylated plant protein 26 OS=Arabidopsis thaliana GN=HIPP26 PE=1 SV=1	Heavy-metal-associated domain	BnaA03g13550D [Brassica napus]
BnaA03G0143600ZS	zs11	--	HVA22-like protein e; K17279 receptor expression-enhancing protein 5/6 (A)	HVA22-like protein e OS=Arabidopsis thaliana GN=HVA22E PE=2 SV=1	TB2/DP1, HVA22 family	PREDICTED: HVA22-like protein e [Brassica rapa]
BnaA03G0143700ZS	zs11	GO:0003677	--	Squamosa promoter-binding-like protein 13B OS=Arabidopsis thaliana GN=SPL13B PE=3 SV=1	SBP domain	PREDICTED: squamosa promoter-binding-like protein 13A [Brassica rapa]
BnaA03G0143800ZS	zs11	GO:0006952	--	Putative defensin-like protein 31 OS=Arabidopsis thaliana GN=At4g29033 PE=3 SV=1	Gamma-thionin family	BnaA03g56330D [Brassica napus]
BnaA03G0143900ZS	zs11	GO:0006629	omega-3 fatty acid desaturase, endoplasmic reticulum-like; K10257 acyl-lipid omega-3 desaturase [EC:1.14.19.25 1.14.19.35 1.14.19.36] (A)	Omega-3 fatty acid desaturase, endoplasmic reticulum OS=Brassica napus GN=FAD3 PE=2 SV=1	Fatty acid desaturase	BnaA03g13590D [Brassica napus]
BnaA03G0144000ZS	zs11	GO:0016491	internal alternative NAD(P)H-ubiquinone oxidoreductase A2, mitochondrial; K17871 NADH:ubiquinone reductase (non-electrogenic) [EC:1.6.5.9] (A)	Internal alternative NAD(P)H-ubiquinone oxidoreductase A2, mitochondrial OS=Arabidopsis thaliana GN=NDA2 PE=2 SV=1	Pyridine nucleotide-disulphide oxidoreductase	BnaA03g13600D [Brassica napus]
BnaA03G0144100ZS	zs11	--	PHD finger-like domain-containing protein 5B; K12834 PHD finger-like domain-containing protein 5A (A)	PHD finger-like domain-containing protein 5B OS=Arabidopsis thaliana GN=At1g07170 PE=2 SV=1	PHF5-like protein	BnaA03g13610D [Brassica napus]
BnaA03G0144200ZS	zs11	GO:0003700	CBF, DREB2-2; dehydration-responsive element-binding protein 1B-like; K09286 EREBP-like factor (A)	Dehydration-responsive element-binding protein 1C OS=Arabidopsis thaliana GN=DREB1C PE=2 SV=2	AP2 domain	DREB2-2 [Brassica napus]
BnaA03G0144300ZS	zs11	--	--	--	--	BnaA08g10650D [Brassica napus]
BnaA03G0144400ZS	zs11	GO:0003677	AP1; apetala1; K09264 MADS-box transcription factor, plant (A)	MADS-box protein FLOWERING LOCUS C OS=Arabidopsis thaliana GN=FLC PE=2 SV=1	SRF-type transcription factor (DNA-binding and dimerisation domain)	MADS-box protein [Brassica napus]
BnaA03G0144500ZS	zs11	GO:0003824	probable protein phosphatase 2C 25; K17506 protein phosphatase 1L [EC:3.1.3.16] (A)	Probable protein phosphatase 2C 25 OS=Arabidopsis thaliana GN=At2g30020 PE=1 SV=1	Protein phosphatase 2C	PREDICTED: probable protein phosphatase 2C 25 [Brassica rapa]
BnaA03G0144600ZS	zs11	GO:0005515	protein transport protein SEC13 homolog B; K14004 protein transport protein SEC13 (A)	Protein transport protein SEC13 homolog B OS=Arabidopsis thaliana GN=SEC13B PE=1 SV=1	WD domain, G-beta repeat	BnaA03g13670D [Brassica napus]
BnaA03G0144700ZS	zs11	GO:0046907	ran-binding protein 1 homolog b; K15306 Ran-binding protein 1 (A)	Ran-binding protein 1 homolog b OS=Arabidopsis thaliana GN=RANBP1B PE=1 SV=2	RanBP1 domain	BnaA03g13680D [Brassica napus]
BnaA03G0144800ZS	zs11	GO:0015079	potassium transporter 1; K03549 KUP system potassium uptake protein (A)	Potassium transporter 1 OS=Arabidopsis thaliana GN=POT1 PE=1 SV=2	K+ potassium transporter	BnaA03g13690D [Brassica napus]
BnaA03G0144900ZS	zs11	GO:0005515	--	F-box/kelch-repeat protein At4g38940 OS=Arabidopsis thaliana GN=At4g38940 PE=1 SV=1	F-box domain	BnaA03g13700D [Brassica napus]
BnaA03G0145000ZS	zs11	GO:0005515	--	F-box/kelch-repeat protein At4g38940 OS=Arabidopsis thaliana GN=At4g38940 PE=1 SV=1	F-box domain	PREDICTED: F-box/kelch-repeat protein At4g38940-like [Brassica rapa]
BnaA03G0145100ZS	zs11	GO:0003824	ubiquitin-activating enzyme E1 1-like; K03178 ubiquitin-activating enzyme E1 [EC:6.2.1.45] (A)	Ubiquitin-activating enzyme E1 1 OS=Arabidopsis thaliana GN=UBA1 PE=1 SV=1	Ubiquitin-activating enzyme active site	PREDICTED: ubiquitin-activating enzyme E1 1-like, partial [Brassica rapa]
BnaA03G0145200ZS	zs11	--	uncharacterized LOC102704525; K01227 mannosyl-glycoprotein endo-beta-N-acetylglucosaminidase [EC:3.2.1.96] (A)	LOB domain-containing protein 12 OS=Arabidopsis thaliana GN=LBD12 PE=2 SV=2	Protein of unknown function DUF260	PREDICTED: LOB domain-containing protein 12-like [Brassica rapa]
BnaA03G0145300ZS	zs11	--	--	Putative defensin-like protein 271 OS=Arabidopsis thaliana GN=At5g23212 PE=3 SV=1	--	BnaA03g13750D [Brassica napus]
BnaA03G0145400ZS	zs11	GO:0004672	Kinase superfamily protein; K04373 p90 ribosomal S6 kinase [EC:2.7.11.1] (A)	Mitogen-activated protein kinase kinase kinase ANP1 OS=Arabidopsis thaliana GN=ANP1 PE=1 SV=2	Protein kinase domain	PREDICTED: mitogen-activated protein kinase kinase kinase ANP1-like [Brassica rapa]
BnaA03G0145500ZS	zs11	--	--	Putative defensin-like protein 271 OS=Arabidopsis thaliana GN=At5g23212 PE=3 SV=1	--	BnaA03g13770D [Brassica napus]
BnaA03G0145600ZS	zs11	--	malonyl-CoA-acyl carrier protein transacylase, mitochondrial; K00645 [acyl-carrier-protein] S-malonyltransferase [EC:2.3.1.39] (A)	Malonyl CoA-acyl carrier protein transacylase OS=Bacillus subtilis (strain 168) GN=fabD PE=3 SV=2	Acyl transferase domain	BnaA03g13780D [Brassica napus]
BnaA03G0145700ZS	zs11	GO:0003700	probable WRKY transcription factor 25; K13423 WRKY transcription factor 25 (A)	Cation/H(+) symporter 13 OS=Arabidopsis thaliana GN=CHX13 PE=1 SV=1	WRKY DNA -binding domain	PREDICTED: cation/H(+) symporter 13 [Brassica rapa]
BnaA03G0145800ZS	zs11	--	--	Protein LURP-one-related 7 OS=Arabidopsis thaliana GN=At2g30270 PE=2 SV=1	LURP-one-related	PREDICTED: protein LURP-one-related 7 [Brassica rapa]
BnaA03G0145900ZS	zs11	--	hypothetical protein; K14794 ribosomal RNA-processing protein 12 (A)	Protein NUCLEAR FUSION DEFECTIVE 4 OS=Arabidopsis thaliana GN=NFD4 PE=3 SV=1	Nodulin-like	PREDICTED: probable transporter mch1 [Brassica rapa]
BnaA03G0146000ZS	zs11	GO:0001522	putative tRNA pseudouridine synthase; K06173 tRNA pseudouridine38-40 synthase [EC:5.4.99.12] (A)	Putative tRNA pseudouridine synthase OS=Arabidopsis thaliana GN=At2g30320 PE=3 SV=1	tRNA pseudouridine synthase	BnaA03g13850D [Brassica napus]
BnaA03G0146100ZS	zs11	GO:0005515	hypothetical protein; K14050 geranylgeranyl transferase type-2 subunit alpha [EC:2.5.1.60] (A)	F-box/kelch-repeat protein At4g38940 OS=Arabidopsis thaliana GN=At4g38940 PE=1 SV=1	F-box domain	BnaA03g13860D [Brassica napus]
BnaA03G0146200ZS	zs11	GO:0005515	KBTBD7; kelch repeat and BTB (POZ) domain containing 7; K10474 kelch repeat and BTB domain-containing protein 6/7 (A)	F-box/kelch-repeat protein At4g38940 OS=Arabidopsis thaliana GN=At4g38940 PE=1 SV=1	F-box domain	PREDICTED: F-box/kelch-repeat protein At4g38940-like [Brassica rapa]
BnaA03G0146300ZS	zs11	--	structure-specific endonuclease subunit slx1-like; K15078 structure-specific endonuclease subunit SLX1 [EC:3.6.1.-] (A)	Biogenesis of lysosome-related organelles complex 1 subunit 1 OS=Arabidopsis thaliana GN=BLOS1 PE=1 SV=1	GIY-YIG catalytic domain	BnaC03g16840D [Brassica napus]
BnaA03G0146400ZS	zs11	GO:0004672	CBL-interacting serine/threonine-protein kinase 11-like; K12761 carbon catabolite-derepressing protein kinase [EC:2.7.11.1] (A)	CBL-interacting serine/threonine-protein kinase 11 OS=Arabidopsis thaliana GN=CIPK11 PE=1 SV=1	NAF domain	BnaA03g13900D [Brassica napus]
BnaA03G0146500ZS	zs11	--	--	EPIDERMAL PATTERNING FACTOR-like protein 6 OS=Arabidopsis thaliana GN=EPFL6 PE=1 SV=1	--	BnaA03g13910D [Brassica napus]
BnaA03G0146600ZS	zs11	--	--	--	--	BnaA03g13920D [Brassica napus]
BnaA03G0146700ZS	zs11	GO:0003677	uncharacterized LOC104595426; K01188 beta-glucosidase [EC:3.2.1.21] (A)	Transcription repressor OFP2 OS=Arabidopsis thaliana GN=OFP2 PE=1 SV=1	DNA-binding domain	BnaCnng39640D [Brassica napus]
BnaA03G0146800ZS	zs11	GO:0005874	KIS; tubulin folding cofactor A protein KIESEL; K17292 tubulin-specific chaperone A (A)	Tubulin-folding cofactor A OS=Arabidopsis thaliana GN=TFCA PE=1 SV=2	Tubulin binding cofactor A	tubulin folding cofactor A protein KIESEL [Arabidopsis thaliana]
BnaA03G0146900ZS	zs11	GO:0003682	MYB-like transcription factor ETC2; K09422 myb proto-oncogene protein, plant (A)	MYB-like transcription factor ETC2 OS=Arabidopsis thaliana GN=ETC2 PE=1 SV=1	Myb-like DNA-binding domain	PREDICTED: MYB-like transcription factor ETC2 isoform X1 [Brassica rapa]
BnaA03G0147000ZS	zs11	GO:0006508	thylakoidal processing peptidase 1, chloroplastic-like; K03100 signal peptidase I [EC:3.4.21.89] (A)	Thylakoidal processing peptidase 1, chloroplastic OS=Arabidopsis thaliana GN=TPP1 PE=2 SV=2	Signal peptidase, peptidase S26	BnaA03g13960D [Brassica napus]
BnaA03G0147100ZS	zs11	GO:0004672	Kinase superfamily protein; K04373 p90 ribosomal S6 kinase [EC:2.7.11.1] (A)	Mitogen-activated protein kinase kinase kinase ANP1 OS=Arabidopsis thaliana GN=ANP1 PE=1 SV=2	Protein kinase domain	PREDICTED: mitogen-activated protein kinase kinase kinase ANP1-like [Brassica rapa]
BnaA03G0147200ZS	zs11	GO:0003677	hypothetical protein; K09287 RAV-like factor (A)	B3 domain-containing transcription repressor VAL1 OS=Arabidopsis thaliana GN=VAL1 PE=1 SV=1	CW-type Zinc Finger	PREDICTED: B3 domain-containing transcription repressor VAL1-like [Brassica rapa]
BnaA03G0147300ZS	zs11	GO:0005506	trans-cinnamate 4-monooxygenase-like; K00487 trans-cinnamate 4-monooxygenase [EC:1.14.13.11] (A)	Trans-cinnamate 4-monooxygenase OS=Arabidopsis thaliana GN=CYP73A5 PE=2 SV=1	Cytochrome P450	BnaA03g14000D [Brassica napus]
BnaA03G0147400ZS	zs11	GO:0005506	trans-cinnamate 4-monooxygenase; K00487 trans-cinnamate 4-monooxygenase [EC:1.14.13.11] (A)	Trans-cinnamate 4-monooxygenase OS=Arabidopsis thaliana GN=CYP73A5 PE=2 SV=1	Cytochrome P450	BnaA03g14010D [Brassica napus]
BnaA03G0147500ZS	zs11	--	nuclear-pore anchor; K09291 nucleoprotein TPR (A)	Protein NETWORKED 4B OS=Arabidopsis thaliana GN=NET4B PE=2 SV=1	--	PREDICTED: tropomyosin beta chain-like [Brassica rapa]
BnaA03G0147600ZS	zs11	--	nuclear-pore anchor; K09291 nucleoprotein TPR (A)	Protein NETWORKED 4B OS=Arabidopsis thaliana GN=NET4B PE=2 SV=1	KIP1-like protein	BnaC03g16970D [Brassica napus]
BnaA03G0147700ZS	zs11	--	nuclear-pore anchor; K09291 nucleoprotein TPR (A)	Protein NETWORKED 4B OS=Arabidopsis thaliana GN=NET4B PE=2 SV=1	KIP1-like protein	BnaA03g14020D [Brassica napus]
BnaA03G0147800ZS	zs11	GO:0005515	uncharacterized LOC100839967; K15095 (+)-neomenthol dehydrogenase [EC:1.1.1.208] (A)	Root phototropism protein 2 OS=Arabidopsis thaliana GN=RPT2 PE=1 SV=2	BTB/POZ domain	PREDICTED: root phototropism protein 2-like [Brassica rapa]
BnaA03G0147900ZS	zs11	--	--	--	--	BnaA03g14040D [Brassica napus]
BnaA03G0148000ZS	zs11	GO:0003700	WRKY transcription factor 22; K13425 WRKY transcription factor 22 (A)	Probable WRKY transcription factor 21 OS=Arabidopsis thaliana GN=WRKY21 PE=2 SV=1	Plant zinc cluster domain	WRKY transcription factor 21 [Brassica rapa]
BnaA03G0148100ZS	zs11	GO:0000786	histone H1.2-like; K11275 histone H1/5 (A)	Histone H1.2 OS=Arabidopsis thaliana GN=At2g30620 PE=1 SV=1	linker histone H1 and H5 family	BnaA03g14070D [Brassica napus]
BnaA03G0148200ZS	zs11	--	--	--	--	BnaA03g14080D [Brassica napus]
BnaA03G0148300ZS	zs11	--	--	Uncharacterized GPI-anchored protein At1g61900 OS=Arabidopsis thaliana GN=At1g61900 PE=1 SV=1	--	BnaA03g14090D [Brassica napus]
BnaA03G0148400ZS	zs11	GO:0005097	hypothetical protein; K19944 TBC1 domain family member 10 (A)	GTPase-activating protein gyp1 OS=Schizosaccharomyces pombe (strain 972 / ATCC 24843) GN=gyp1 PE=3 SV=1	Rab-GTPase-TBC domain	BnaA03g14100D [Brassica napus]
BnaA03G0148500ZS	zs11	GO:0004672	PTI1-like tyrosine-protein kinase 2; K13436 pto-interacting protein 1 [EC:2.7.11.1] (A)	PTI1-like tyrosine-protein kinase 2 OS=Arabidopsis thaliana GN=PTI12 PE=1 SV=1	Protein tyrosine kinase	BnaA03g14110D [Brassica napus]
BnaA03G0148600ZS	zs11	GO:0005506	indoleacetaldoxime dehydratase; K11868 indoleacetaldoxime dehydratase [EC:4.99.1.6] (A)	Indoleacetaldoxime dehydratase OS=Arabidopsis thaliana GN=CYP71A13 PE=1 SV=1	Cytochrome P450	PREDICTED: indoleacetaldoxime dehydratase [Brassica rapa]
BnaA03G0148700ZS	zs11	--	--	Protein JASON OS=Arabidopsis thaliana GN=JASON PE=2 SV=1	--	PREDICTED: uncharacterized protein LOC103857339 isoform X1 [Brassica rapa]
BnaA03G0148800ZS	zs11	GO:0005515	glutathione S-transferase F9; K00799 glutathione S-transferase [EC:2.5.1.18] (A)	Glutathione S-transferase F9 OS=Arabidopsis thaliana GN=GSTF9 PE=1 SV=1	Glutathione S-transferase, N-terminal domain	PREDICTED: glutathione S-transferase F9 [Brassica rapa]
BnaA03G0148900ZS	zs11	GO:0005515	glutathione S-transferase F10; K00799 glutathione S-transferase [EC:2.5.1.18] (A)	Glutathione S-transferase F10 OS=Arabidopsis thaliana GN=GSTF10 PE=1 SV=3	Glutathione S-transferase, C-terminal domain	BnaC03g17120D [Brassica napus]
BnaA03G0149000ZS	zs11	--	--	--	--	BnaA03g14160D [Brassica napus]
BnaA03G0149100ZS	zs11	GO:0016021	uncharacterized LOC104585983; K03189 urease accessory protein (A)	Cytochrome b561 domain-containing protein At2g30890 OS=Arabidopsis thaliana GN=At2g30890 PE=2 SV=1	Eukaryotic cytochrome b561	BnaA03g14180D [Brassica napus]
BnaA03G0149200ZS	zs11	GO:0003779	actin-related protein 2/3 complex subunit 1A-like; K05757 actin related protein 2/3 complex, subunit 1A/1B (A)	Actin-related protein 2/3 complex subunit 1A OS=Arabidopsis thaliana GN=ARPC1A PE=2 SV=1	WD domain, G-beta repeat	BnaA03g14200D [Brassica napus]
BnaA03G0149300ZS	zs11	--	mediator of RNA polymerase II transcription subunit 37f-like; K09490 heat shock 70kDa protein 5 (A)	Mediator of RNA polymerase II transcription subunit 37f OS=Arabidopsis thaliana GN=MED37F PE=1 SV=2	Hsp70 protein	PREDICTED: mediator of RNA polymerase II transcription subunit 37f [Brassica rapa]
BnaA03G0149400ZS	zs11	GO:0004672	serine/threonine-protein kinase EDR1; K04424 sterile alpha motif and leucine zipper containing kinase AZK [EC:2.7.11.25] (A)	Serine/threonine-protein kinase CTR1 OS=Arabidopsis thaliana GN=CTR1 PE=1 SV=1	Ethylene-responsive protein kinase Le-CTR1	BnaA03g14220D [Brassica napus]
BnaA03G0149500ZS	zs11	--	--	Oxysterol-binding protein-related protein 1B OS=Arabidopsis thaliana GN=ORP1B PE=2 SV=1	--	BnaA03g14230D [Brassica napus]
BnaA03G0149600ZS	zs11	--	uncharacterized LOC103865097; K02116 ATP synthase protein I (A)	--	--	BnaA03g14240D [Brassica napus]
BnaA03G0149700ZS	zs11	GO:0005507	--	Mavicyanin OS=Cucurbita pepo PE=1 SV=1	Plastocyanin-like domain	BnaA03g14250D [Brassica napus]
BnaA03G0149800ZS	zs11	GO:0003924	GTP-binding protein TypA/BipA homolog; K06207 GTP-binding protein (A)	GTP-binding protein TypA/BipA homolog OS=Helicobacter pylori (strain ATCC 700392 / 26695) GN=typA PE=3 SV=1	Elongation factor Tu domain 2	PREDICTED: LOW QUALITY PROTEIN: translation factor GUF1 homolog, mitochondrial-like [Brassica rapa]
BnaA03G0149900ZS	zs11	--	--	CLAVATA3/ESR (CLE)-related protein 6 OS=Arabidopsis thaliana GN=CLE6 PE=2 SV=1	--	BnaA03g14280D [Brassica napus]
BnaA03G0150000ZS	zs11	GO:0004806	phospholipase A(1) DAD1, chloroplastic-like; K16818 phospholipase A1 [EC:3.1.1.32] (A)	Phospholipase A1-IIbeta OS=Arabidopsis thaliana GN=At2g31100 PE=1 SV=2	Lipase (class 3)	BnaA03g14290D [Brassica napus]
BnaA03G0150100ZS	zs11	--	--	Protein trichome birefringence-like 40 OS=Arabidopsis thaliana GN=TBL40 PE=2 SV=2	PMR5 N terminal Domain	PREDICTED: protein trichome birefringence-like 40 [Brassica rapa]
BnaA03G0150200ZS	zs11	--	--	--	--	BnaA03g14310D [Brassica napus]
BnaA03G0150300ZS	zs11	GO:0006353	--	Rho-N domain-containing protein 1, chloroplastic OS=Arabidopsis thaliana GN=RHON1 PE=1 SV=1	Rho termination factor, N-terminal domain	PREDICTED: rho-N domain-containing protein 1, chloroplastic-like [Brassica rapa]
BnaA03G0150400ZS	zs11	GO:0003682	myb-related protein Myb4-like; K09422 myb proto-oncogene protein, plant (A)	Myb-related protein Myb4 OS=Oryza sativa subsp. japonica GN=MYB4 PE=2 SV=2	Myb-like DNA-binding domain	BnaA03g14350D [Brassica napus]
BnaA03G0150500ZS	zs11	GO:0003700	ethylene-responsive transcription factor 15-like; K14516 ethylene-responsive transcription factor 1 (A)	Ethylene-responsive transcription factor 15 OS=Arabidopsis thaliana GN=ERF15 PE=2 SV=1	AP2 domain	PREDICTED: ethylene-responsive transcription factor 15-like [Brassica rapa]
BnaA03G0150600ZS	zs11	GO:0005524	cell division control protein 48 homolog C-like; K14571 ribosome biogenesis ATPase (A)	Cell division control protein 48 homolog C OS=Arabidopsis thaliana GN=CDC48C PE=2 SV=2	ATPase family associated with various cellular activities (AAA)	PREDICTED: cell division control protein 48 homolog C-like [Brassica rapa]
BnaA03G0150700ZS	zs11	--	cell division control protein 48 homolog C-like; K14571 ribosome biogenesis ATPase (A)	Cell division control protein 48 homolog C OS=Arabidopsis thaliana GN=CDC48C PE=2 SV=2	--	PREDICTED: cell division control protein 48 homolog C-like [Brassica rapa]
BnaA03G0150800ZS	zs11	--	CDT1-like protein a, chloroplastic; K10727 chromatin licensing and DNA replication factor 1 (A)	CDT1-like protein a, chloroplastic OS=Arabidopsis thaliana GN=CDT1A PE=1 SV=1	DNA replication factor CDT1 like	PREDICTED: CDT1-like protein a, chloroplastic [Brassica rapa]
BnaA03G0150900ZS	zs11	GO:0004416	hydroxyacylglutathione hydrolase 2, mitochondrial-like; K01069 hydroxyacylglutathione hydrolase [EC:3.1.2.6] (A)	Hydroxyacylglutathione hydrolase 2, mitochondrial OS=Arabidopsis thaliana GN=At2g31350 PE=1 SV=1	Metallo-beta-lactamase superfamily	BnaA03g14380D [Brassica napus]
BnaA03G0151000ZS	zs11	GO:0006629	delta-9 acyl-lipid desaturase 2-like; K00507 stearoyl-CoA desaturase (Delta-9 desaturase) [EC:1.14.19.1] (A)	Delta-9 acyl-lipid desaturase 2 OS=Arabidopsis thaliana GN=ADS2 PE=2 SV=2	Fatty acid desaturase	PREDICTED: delta-9 acyl-lipid desaturase 2-like [Brassica rapa]
BnaA03G0151100ZS	zs11	--	--	Probable transcription factor PosF21 OS=Arabidopsis thaliana GN=POSF21 PE=2 SV=1	--	BnaC03g17460D [Brassica napus]
BnaA03G0151200ZS	zs11	--	--	B-box zinc finger protein 25 OS=Arabidopsis thaliana GN=BBX25 PE=1 SV=2	--	BnaA03g14410D [Brassica napus]
BnaA03G0151300ZS	zs11	GO:0004747	probable fructokinase-1; K00847 fructokinase [EC:2.7.1.4] (A)	Probable fructokinase-1 OS=Arabidopsis thaliana GN=At2g31390 PE=2 SV=1	pfkB family carbohydrate kinase	BnaC03g17470D [Brassica napus]
BnaA03G0151400ZS	zs11	--	rRNA-processing protein CGR1; K14822 rRNA-processing protein CGR1 (A)	Pentatricopeptide repeat-containing protein At2g31400, chloroplastic OS=Arabidopsis thaliana GN=At2g31400 PE=2 SV=1	--	BnaC03g17480D [Brassica napus]
BnaA03G0151500ZS	zs11	GO:0016021	gamma-secretase subunit APH1-like; K06172 anterior pharynx defective 1 (A)	Gamma-secretase subunit APH1-like OS=Arabidopsis thaliana GN=At2g31440 PE=2 SV=2	Aph-1 protein	BnaA03g14440D [Brassica napus]
BnaA03G0151600ZS	zs11	GO:0003677	endonuclease III homolog 1, chloroplastic; K10773 endonuclease III [EC:4.2.99.18] (A)	Endonuclease III homolog 1, chloroplastic OS=Arabidopsis thaliana GN=NTH1 PE=2 SV=2	Helix-hairpin-helix motif	PREDICTED: endonuclease III homolog 1, chloroplastic isoform X3 [Brassica rapa]
BnaA03G0151700ZS	zs11	--	TOR kinase binding protein; K08266 G protein beta subunit-like (A)	--	--	expressed protein [Arabidopsis thaliana]
BnaA03G0151800ZS	zs11	GO:0004672	calcium-dependent protein kinase 24; K13412 calcium-dependent protein kinase [EC:2.7.11.1] (A)	Calcium-dependent protein kinase 24 OS=Arabidopsis thaliana GN=CPK24 PE=2 SV=1	EF-hand domain pair	PREDICTED: calcium-dependent protein kinase 24 isoform X1 [Brassica rapa]
BnaA03G0151900ZS	zs11	GO:0005515	probable E3 ubiquitin-protein ligase ARI7; K11968 ariadne-1 [EC:2.3.2.27] (A)	Probable E3 ubiquitin-protein ligase ARI7 OS=Arabidopsis thaliana GN=ARI7 PE=2 SV=1	IBR domain, a half RING-finger domain	BnaA03g14490D [Brassica napus]
BnaA03G0152000ZS	zs11	GO:0015031	histone acetyltransferase type B subunit 2-like; K10752 histone-binding protein RBBP4 (A)	Preprotein translocase subunit SCY2, chloroplastic OS=Arabidopsis thaliana GN=SCY2 PE=2 SV=1	SecY translocase	PREDICTED: preprotein translocase subunit SCY2, chloroplastic [Brassica rapa]
BnaA03G0152100ZS	zs11	--	--	--	--	PREDICTED: uncharacterized protein LOC103857380 [Brassica rapa]
BnaA03G0152200ZS	zs11	GO:0006629	hypothetical protein; K00679 phospholipid:diacylglycerol acyltransferase [EC:2.3.1.158] (A)	GDSL esterase/lipase At2g24560 OS=Arabidopsis thaliana GN=At2g24560 PE=2 SV=2	GDSL-like Lipase/Acylhydrolase	BnaC03g17570D [Brassica napus]
BnaA03G0152300ZS	zs11	--	--	--	Protein of unknown function (DUF1685)	BnaA03g14560D [Brassica napus]
BnaA03G0152400ZS	zs11	GO:0004602	GPX2; probable glutathione peroxidase 2; K00432 glutathione peroxidase [EC:1.11.1.9] (A)	Probable glutathione peroxidase 2 OS=Arabidopsis thaliana GN=GPX2 PE=1 SV=1	Glutathione peroxidase	PREDICTED: probable glutathione peroxidase 2 [Brassica rapa]
BnaA03G0152500ZS	zs11	--	--	--	--	BnaA03g14590D [Brassica napus]
BnaA03G0152600ZS	zs11	--	--	--	--	BnaC01g26070D [Brassica napus]
BnaA03G0152800ZS	zs11	GO:0003677	glutamate receptor 2.1-like; K05387 glutamate receptor, ionotropic, plant (A)	Putative B3 domain-containing protein REM15 OS=Arabidopsis thaliana GN=REM15.15 PE=3 SV=2	B3 DNA binding domain	PREDICTED: putative B3 domain-containing protein REM15 [Brassica rapa]
BnaA03G0152900ZS	zs11	GO:0000287	tRNA(His) guanylyltransferase 1-like; K10761 tRNA(His) guanylyltransferase [EC:2.7.7.79] (A)	tRNA(His) guanylyltransferase 1 OS=Arabidopsis thaliana GN=THG1 PE=1 SV=1	Thg1 C terminal domain	PREDICTED: tRNA(His) guanylyltransferase 1 [Brassica rapa]
BnaA03G0153000ZS	zs11	--	INO80 complex subunit D-like; K18401 KAT8 regulatory NSL complex subunit 2 (A)	INO80 complex subunit D OS=Dictyostelium discoideum GN=DDB_G0288447 PE=3 SV=1	Potential DNA-binding domain	PREDICTED: INO80 complex subunit D [Brassica rapa]
BnaA03G0153100ZS	zs11	GO:0005634	E3 ubiquitin-protein ligase SINA-like 2; K04506 E3 ubiquitin-protein ligase SIAH1 [EC:2.3.2.27] (A)	E3 ubiquitin-protein ligase SINA-like 2 OS=Arabidopsis thaliana GN=At1g66620 PE=2 SV=1	Seven in absentia protein family	PREDICTED: E3 ubiquitin-protein ligase SINA-like 2 [Brassica rapa]
BnaA03G0153200ZS	zs11	--	--	--	--	hypothetical protein VITISV_022106 [Vitis vinifera]
BnaA03G0153300ZS	zs11	GO:0006886	IPO8; importin 8; K18755 importin-8 (A)	Importin beta-like SAD2 OS=Arabidopsis thaliana GN=SAD2 PE=1 SV=1	Importin-beta N-terminal domain	BnaC03g17650D [Brassica napus]
BnaA03G0153400ZS	zs11	--	ipo8; importin 8; K18755 importin-8 (A)	Importin beta-like SAD2 OS=Arabidopsis thaliana GN=SAD2 PE=1 SV=1	--	PREDICTED: probable importin-7 homolog [Brassica rapa]
BnaA03G0153500ZS	zs11	GO:0003924	ras-related protein RABA5d-like; K07904 Ras-related protein Rab-11A (A)	Ras-related protein RABA5d OS=Arabidopsis thaliana GN=RABA5D PE=1 SV=1	Ras family	PREDICTED: ras-related protein RABA5d-like [Brassica rapa]
BnaA03G0153600ZS	zs11	GO:0004806	glycerolipase A1; K16818 phospholipase A1 [EC:3.1.1.32] (A)	Phospholipase A1-Ialpha2, chloroplastic OS=Arabidopsis thaliana GN=At2g31690 PE=1 SV=1	Lipase (class 3)	BnaA03g14670D [Brassica napus]
BnaA03G0153700ZS	zs11	GO:0046983	uncharacterized LOC101301142; K05765 cofilin (A)	Transcription factor bHLH113 OS=Arabidopsis thaliana GN=BHLH113 PE=2 SV=1	VMA21-like domain	BnaA03g14680D [Brassica napus]
BnaA03G0153800ZS	zs11	GO:0008152	UDP-glycosyltransferase 74E2-like; K13691 pathogen-inducible salicylic acid glucosyltransferase [EC:2.4.1.-] (A)	UDP-glycosyltransferase 74D1 OS=Arabidopsis thaliana GN=UGT74D1 PE=1 SV=1	UDP-glucoronosyl and UDP-glucosyl transferase	PREDICTED: UDP-glycosyltransferase 74D1 [Brassica rapa]
BnaA03G0153900ZS	zs11	GO:0003676	probable E3 ubiquitin-protein ligase ARI11; K11968 ariadne-1 [EC:2.3.2.27] (A)	Probable E3 ubiquitin-protein ligase ARI11 OS=Arabidopsis thaliana GN=ARI11 PE=2 SV=1	Zinc finger, C3HC4 type (RING finger)	PREDICTED: probable E3 ubiquitin-protein ligase ARI11 [Brassica rapa]
BnaA03G0154000ZS	zs11	GO:0004672	probable serine/threonine-protein kinase DDB_G0271682; K06272 integrin-linked kinase [EC:2.7.11.1] (A)	Serine/threonine-protein kinase CTR1 OS=Arabidopsis thaliana GN=CTR1 PE=1 SV=1	Ankyrin repeats (3 copies)	PREDICTED: serine/threonine-protein kinase HT1 isoform X1 [Brassica rapa]
BnaA03G0154100ZS	zs11	--	acetolactate synthase small subunit 2, chloroplastic-like; K01653 acetolactate synthase I/III small subunit [EC:2.2.1.6] (A)	Acetolactate synthase small subunit 2, chloroplastic OS=Arabidopsis thaliana GN=At2g31810 PE=1 SV=1	ACT domain	BnaA03g14730D [Brassica napus]
BnaA03G0154200ZS	zs11	--	--	--	--	BnaA03g14740D [Brassica napus]
BnaA03G0154300ZS	zs11	--	--	--	RAP domain	BnaA03g14770D [Brassica napus]
BnaA03G0154400ZS	zs11	GO:0004672	leucine-rich repeat receptor-like serine/threonine/tyrosine-protein kinase SOBIR1; K04730 interleukin-1 receptor-associated kinase 1 [EC:2.7.11.1] (A)	Leucine-rich repeat receptor-like serine/threonine/tyrosine-protein kinase SOBIR1 OS=Arabidopsis thaliana GN=SOBIR1 PE=1 SV=1	Leucine rich repeat	PREDICTED: leucine-rich repeat receptor-like serine/threonine/tyrosine-protein kinase SOBIR1 [Brassica rapa]
BnaA03G0154500ZS	zs11	GO:0003774	myosin-12; K10357 myosin V (A)	Myosin-12 OS=Arabidopsis thaliana GN=XI-F PE=2 SV=1	Myosin N-terminal SH3-like domain	PREDICTED: myosin-12 isoform X1 [Brassica rapa]
BnaA03G0154600ZS	zs11	GO:0003824	cyclic pyranopterin monophosphate synthase, mitochondrial; K03639 cyclic pyranopterin phosphate synthase [EC:4.1.99.18] (A)	Cyclic pyranopterin monophosphate synthase, mitochondrial OS=Arabidopsis thaliana GN=CNX2 PE=1 SV=1	4Fe-4S single cluster domain	PREDICTED: cyclic pyranopterin monophosphate synthase, mitochondrial [Brassica rapa]
BnaA03G0154700ZS	zs11	GO:0005524	DNA repair protein RAD50-like; K10866 DNA repair protein RAD50 [EC:3.6.-.-] (A)	DNA repair protein RAD50 OS=Arabidopsis thaliana GN=RAD50 PE=1 SV=2	Putative exonuclease SbcCD, C subunit	PREDICTED: DNA repair protein RAD50 [Brassica rapa]
BnaA03G0154800ZS	zs11	GO:0004869	cysteine proteinase inhibitor 2-like; K13899 cystatin-C (A)	Xyloglucan galactosyltransferase KATAMARI1 homolog OS=Oryza sativa subsp. japonica GN=Os03g0144800 PE=2 SV=1	Cystatin domain	BnaA03g14810D [Brassica napus]
BnaA03G0154900ZS	zs11	GO:0003677	DNA topoisomerase 3-beta; K03165 DNA topoisomerase III [EC:5.99.1.2] (A)	DNA topoisomerase 3-beta OS=Arabidopsis thaliana GN=At2g32000 PE=2 SV=1	Toprim domain	PREDICTED: DNA topoisomerase 3-beta isoform X1 [Brassica rapa]
BnaA03G0155000ZS	zs11	GO:0003735	40S ribosomal protein S12-2; K02951 small subunit ribosomal protein S12e (A)	40S ribosomal protein S12-2 OS=Arabidopsis thaliana GN=RPS12C PE=1 SV=1	Ribosomal protein L7Ae/L30e/S12e/Gadd45 family	BnaC03g17910D [Brassica napus]
